# Supplementary material for: The Plasma Membrane Ca 2+ ‐ATPase2 (PMCA2) Is Involved in the Regulation of Purkinje Cell Dendritic Growth in Cerebellar Organotypic Slice Cultures
Source: Hindawi journal article supplement (doi:10.1155/2013/321685), 2013-01-01
Supplement: f1 [file 321685.f1.zip]

**A**

Rescue by blockade of P/Q and T-channels

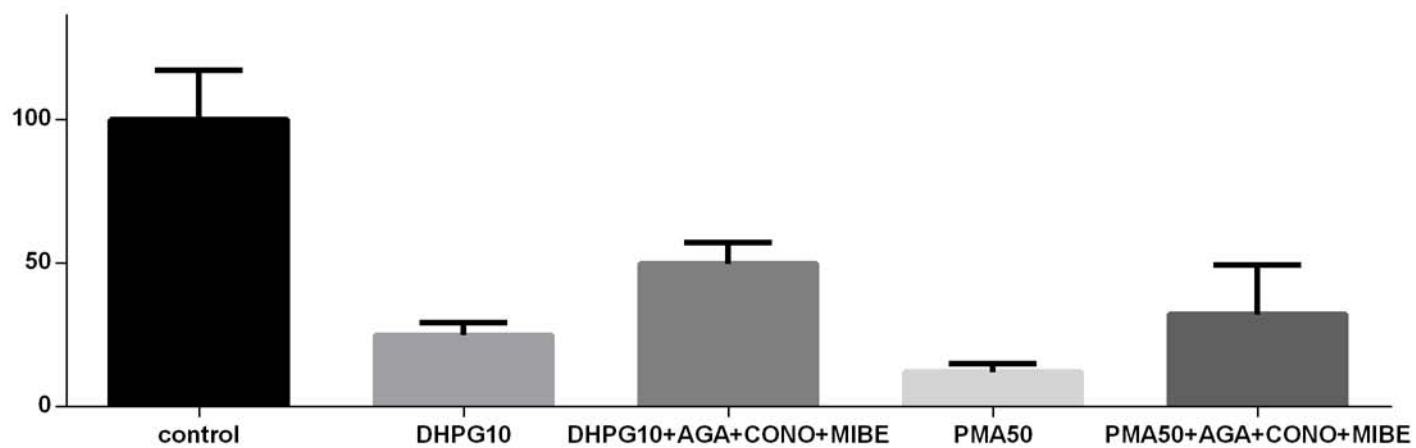**B**

Carboxyeosin with P/Q and T block

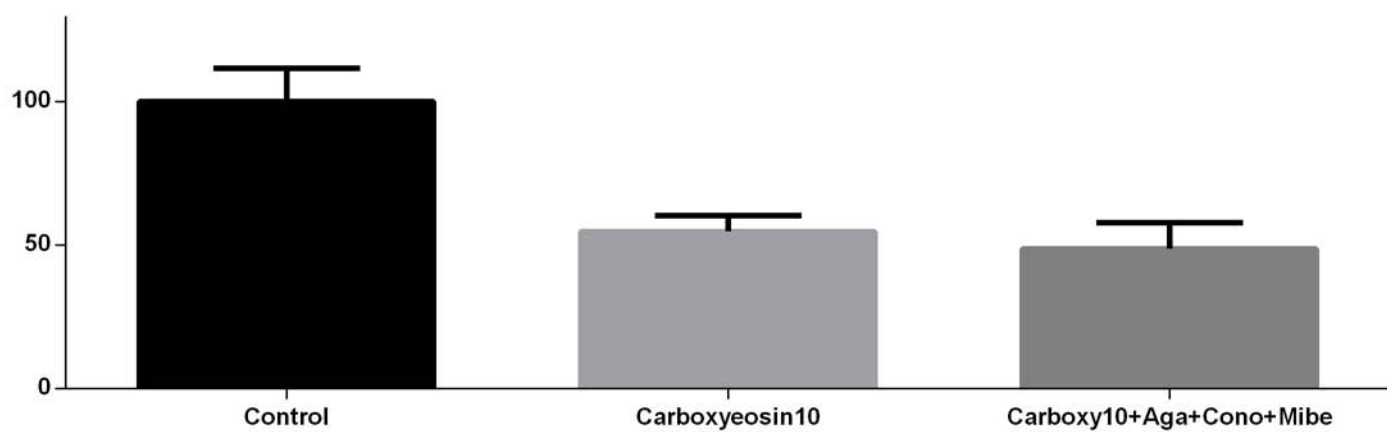

**Supplemental Fig. 1:**

A) Size of the Purkinje cell dendritic arbors with blockade of P/Q-type and T-type  $\text{Ca}^{2+}$  channels and mGluR1/PKC stimulation: Blockade of P/Q-type and T-type  $\text{Ca}^{2+}$  channels with mGluR1 activation does provide a rescue from DHPG mediated dendritic reduction. Similarly,  $\text{Ca}^{2+}$  channels blockade shows similar dendritic rescue when PKC is activated by PMA. The mean size of control Purkinje cells was considered as 100%. Error bars represent the SEM. One set of experimental data with  $n=15$ .

B) Size of the Purkinje cell dendritic arbors with blockade of P/Q-type and T-type  $\text{Ca}^{2+}$  channels and PMCA2 inhibition: The Purkinje cell dendritic arbors in with blockade of P/Q-type and T-type  $\text{Ca}^{2+}$  channels in addition to PMCA2 does not have an additive rescuing effect when PMCA2 was inhibited by carboxyeosin. The mean size of control Purkinje cells was considered as 100%. Error bars represent the SEM. One set of experimental data with  $n=25$ .
