# Supplementary material for: The Plasma Membrane Ca 2+ ‐ATPase2 (PMCA2) Is Involved in the Regulation of Purkinje Cell Dendritic Growth in Cerebellar Organotypic Slice Cultures
Source: Hindawi journal article supplement (doi:10.1155/2013/321685), 2013-01-01
Supplement: f1 [file 321685.f1.zip]

**Table-1:**

| Statistics\conditions | control | Carboxyeosin10 | carboxyeosin20 | DHPG10 | DHPG10 +<br>Carboxyeosin20 |
|-----------------------|---------|----------------|----------------|--------|----------------------------|
| Number of values      | 58      | 68             | 52             | 91     | 65                         |
| Mean dendritic area   | 3820    | 3201           | 3082           | 1816   | 2656                       |
| Std. Deviation        | 1355    | 1394           | 1309           | 658    | 965                        |
| Std. Error of Mean    | 177     | 169            | 181            | 69     | 119                        |

**Supplemental Table 1:**

Measured values for the mean dendritic tree size of Purkinje cells in the different treatment conditions given in square micrometers. The “number of values” indicates the number measured Purkinje cell dendritic trees per treatment condition, the values for standard deviation and standard error of the mean indicate the variance of the data sets.

**Table-2:**

| Statistics\conditions | control | Carboxyeosin10 | carboxyeosin20 | DHPG10 | DHPG10 +<br>Carboxyeosin20 |
|-----------------------|---------|----------------|----------------|--------|----------------------------|
| Number of values      | 22      | 22             | 22             | 22     | 22                         |
| Mean branchpoints     | 30      | 23             | 19             | 11     | 21                         |
| Std. Deviation        | 5       | 5              | 4              | 3      | 4                          |
| Std. Error of Mean    | 1       | 1              | 1              | 1      | 1                          |

**Supplemental Table 2:**

Measured values for the mean dendritic branch points of Purkinje cells from different treatment conditions. The “number of values” indicates the number of quantified Purkinje cells for their dendritic branch points per treatment condition, the values for standard deviation and standard error of the mean indicate the variance of the data sets.
