# Supplementary material for: The Plasma Membrane Ca2+-ATPase2 (PMCA2) Is Involved in the Regulation of Purkinje Cell Dendritic Growth in Cerebellar Organotypic Slice Cultures
Source: Neural Plast. 2013 Sep 29;2013:321685. doi: 10.1155/2013/321685 (PMC3830849; doi:10.1155/2013/321685)
Supplement: Supplementary file 1 — The supplemental Figure 1 provides data of additional experiments suggesting that the effect of carboxyeosin is due to an inactivation of voltage-gated Ca2+channels. The supplemental tables contains the concrete figures of the measurements of dendritic area (supplemental table 1) and branchpoint numbers (supplemental table 2) shown in Figures. 2 and 4 of the manuscript. [file 321685.f1.zip]

Archive with 3 entries (2 files):
- 321685.f1/
- 321685.f1/321685.pdf
- 321685.f1/mat.321685.v2.pdf
